# Supplementary material for: Small-Molecule–Mediated Stabilization of PP2A Modulates the Homologous Recombination Pathway and Potentiates DNA Damage-Induced Cell Death
Source: PubMed Central journal article supplement — Mol Cancer Ther. 2023 Feb 14;22(5):599–615. doi: 10.1158/1535-7163.MCT-21-0880 (PMC10157366; doi:10.1158/1535-7163.mct-21-0880), 2023-02-14
Supplement: mct-21-0880_fig.s1_suppsf1.pdf [file mct-21-0880_fig.s1_suppsf1.pdf]

Supplementary Figure 1

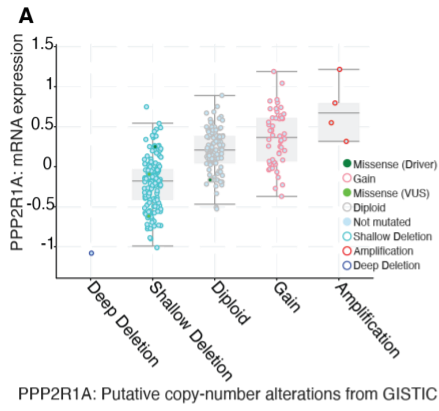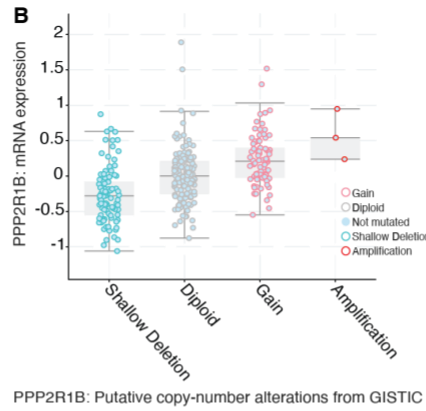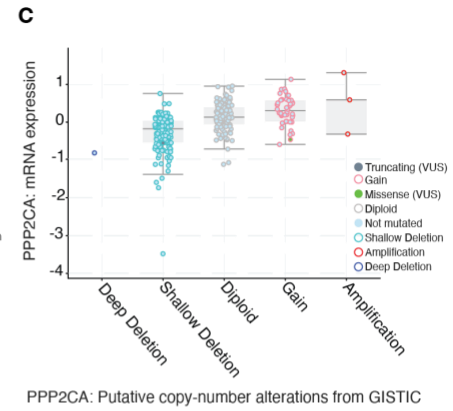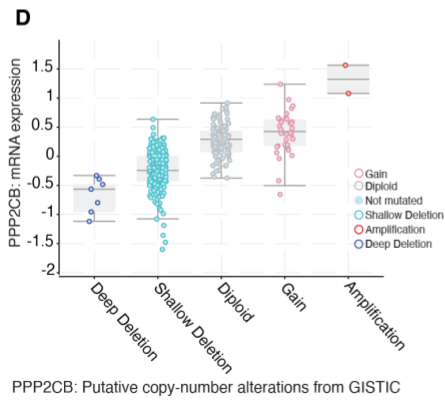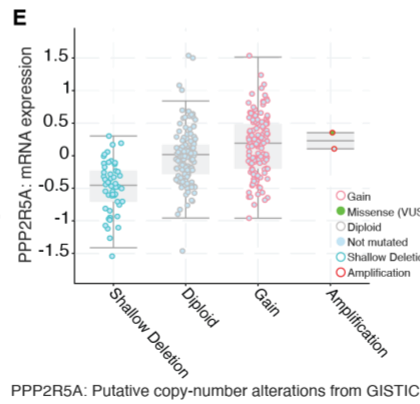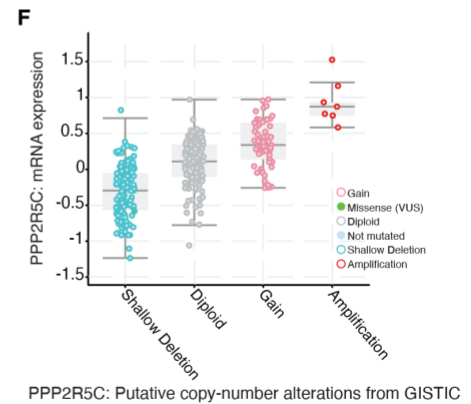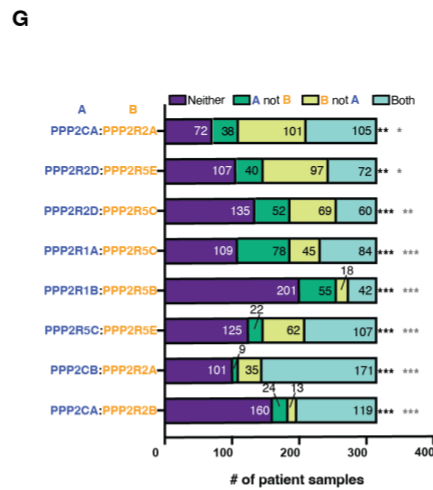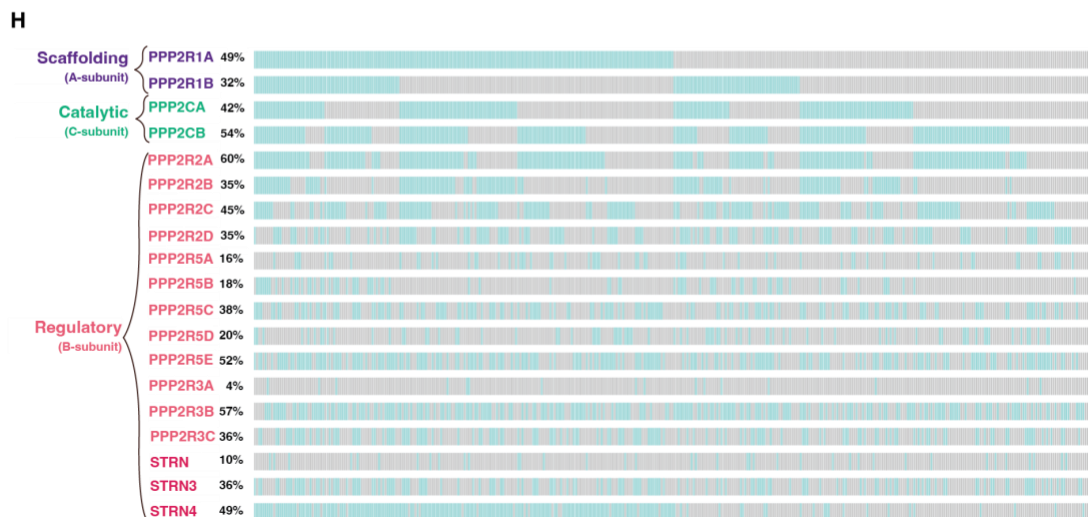

**Supplementary Figure 1 – PP2A family genes mRNA profiles show putative copy-number alterations proportionally correlate with their respective mRNA expression levels.** Shallow and deep deletion, diploid, gain and amplification copy-number alterations for A) PPP2R1A, B) PPP2R1B, C) PPP2CA, D) PPP2CB, E) PPP2R5A, F) PPP2R5C, relative its own mRNA expression levels. G) Analysis of statistically significant co-occurrences in PP2A genes using panel C's data. \*\*\* $p < 0.001$ , \*\* $p < 0.01$ ; \*\*\* $q < 0.001$ , \*\* $q < 0.01$ , \* $q < 0.05$ . Tendency – co-occurrence. Statistical analysis provided by cBioPortal. H) Individual patient tumor data analysis showing frequency of PP2A genes heterozygous loss as well as co-occurrence profiles. Each bar represents an individual tumor, for which grey signifies negative and blue positive for Hetloss.
