# Supplementary material for: Small-Molecule–Mediated Stabilization of PP2A Modulates the Homologous Recombination Pathway and Potentiates DNA Damage-Induced Cell Death
Source: PubMed Central journal article supplement — Mol Cancer Ther. 2023 Feb 14;22(5):599–615. doi: 10.1158/1535-7163.MCT-21-0880 (PMC10157366; doi:10.1158/1535-7163.mct-21-0880), 2023-02-14
Supplement: mct-21-0880_fig.s3_suppsf3.pdf [file mct-21-0880_fig.s3_suppsf3.pdf]

Supplementary Figure 3

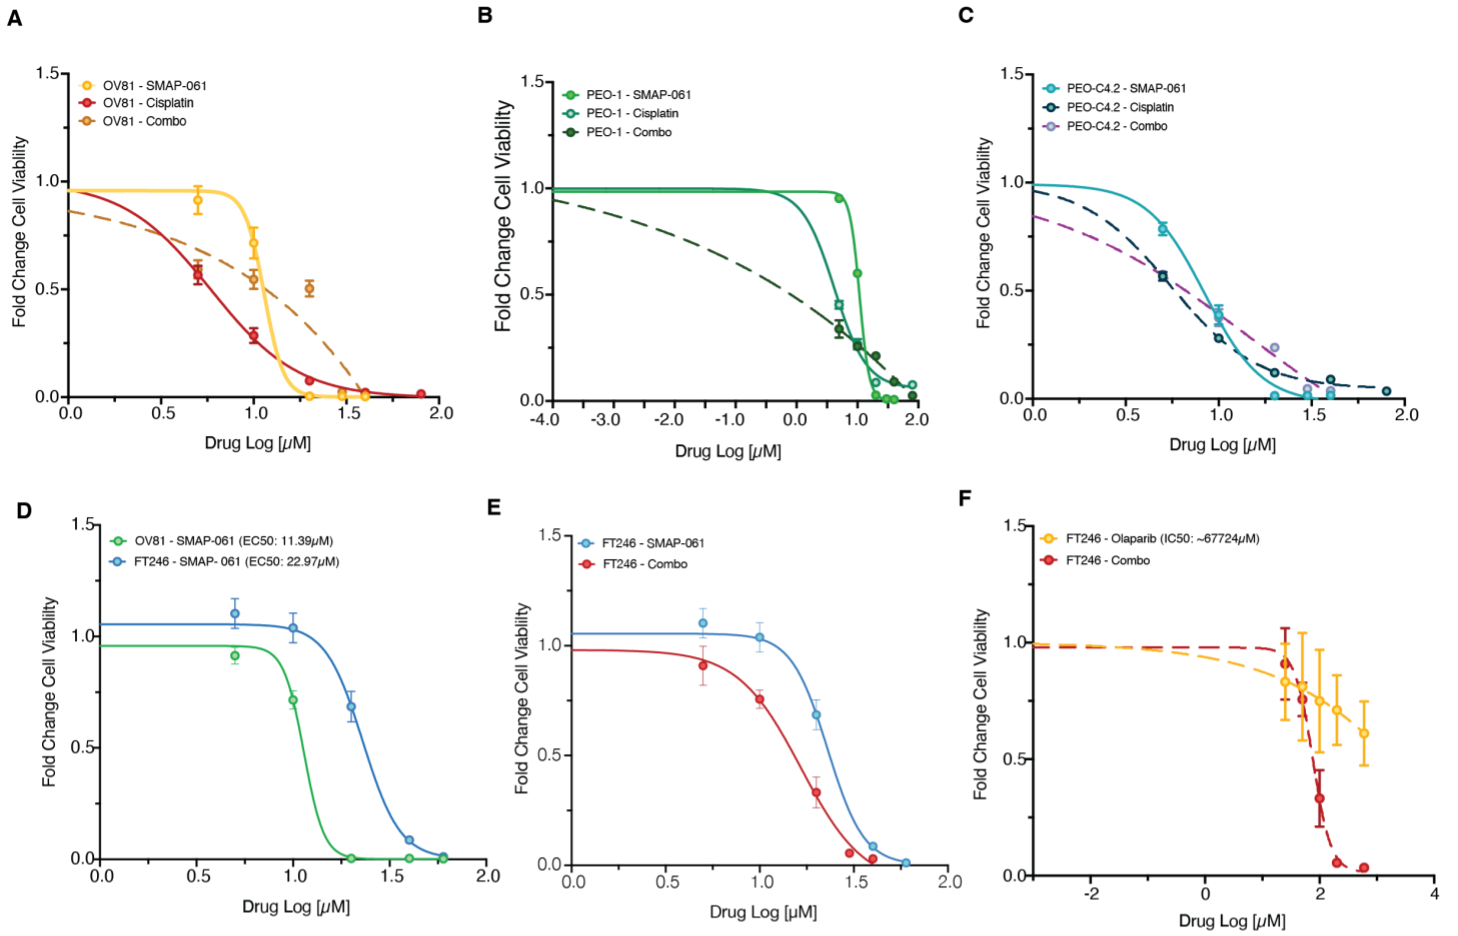

**Supplementary Figure 3 – HGSC and Fallopian Tube non-malignant cells respond differently to SMAP-061 alone and to combination strategies.** A) OV81, B) PEO-1 and C) PEO-C4.2 cells were treated with increasing doses of SMAP-061, cisplatin or combination of both to measure cell viability at 48 hours using MTT. D) Comparison of FT246 and OV81 responses to SMAP-061 utilizing MTT was performed. E) and F) FT246 cells were treated with increasing doses of SMAP-061, Olaparib, or combination of the two and cell viability after 48 hours were measured. Data presented as the mean  $\pm$  SD (n=3).
