# Supplementary material for: Small-Molecule–Mediated Stabilization of PP2A Modulates the Homologous Recombination Pathway and Potentiates DNA Damage-Induced Cell Death
Source: PubMed Central journal article supplement — Mol Cancer Ther. 2023 Feb 14;22(5):599–615. doi: 10.1158/1535-7163.MCT-21-0880 (PMC10157366; doi:10.1158/1535-7163.mct-21-0880), 2023-02-14
Supplement: mct-21-0880_fig.s4_supps4.pdf [file mct-21-0880_fig.s4_supps4.pdf]

Supplementary Figure 4

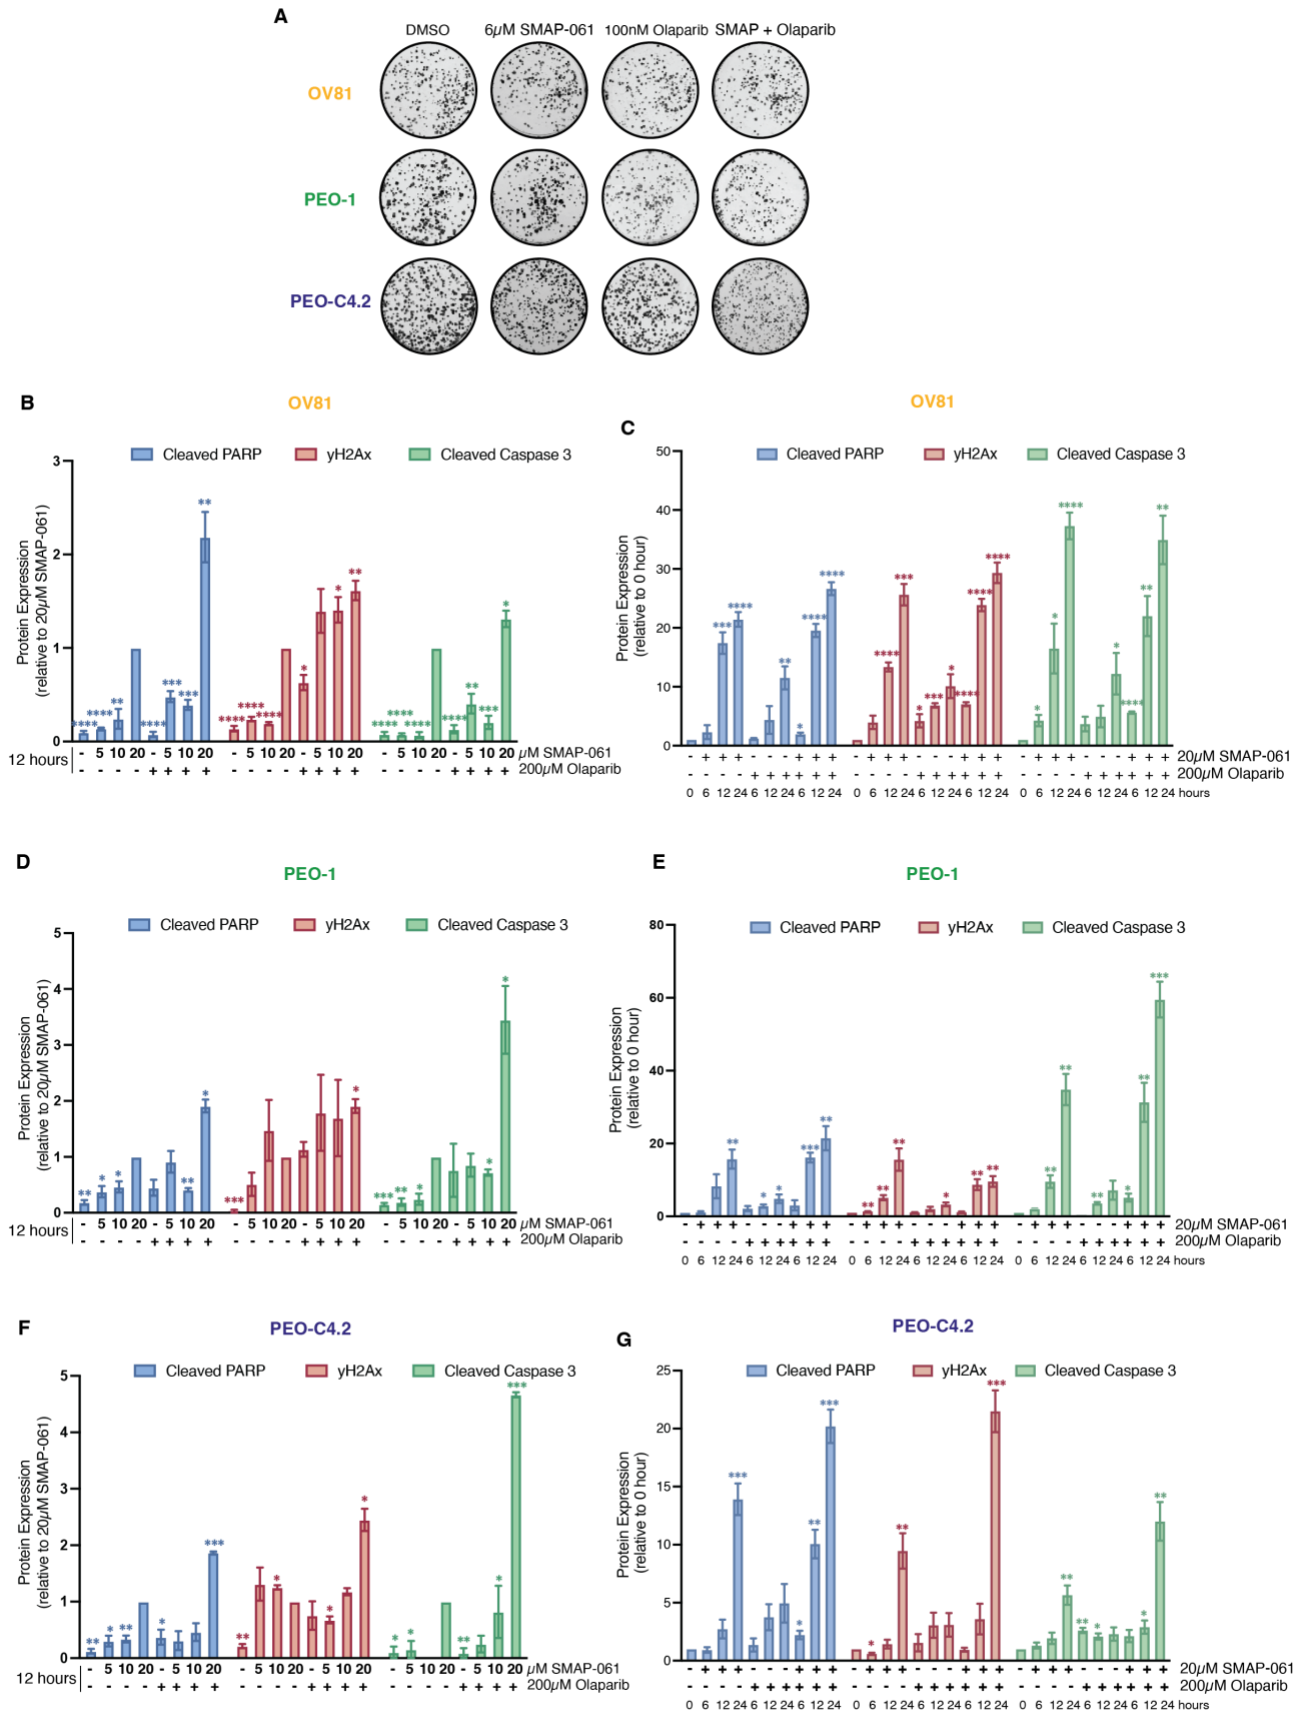

**Supplementary Figure 4 – Combination of SMAP-061 and PARPi synergistically reduces cellular proliferation capacity and induces cell death in a dose and time dependent manner.** A) Clonogenic assay of OV81, PEO-1 and PEO-C4.2 cells treated with DMSO, 6 $\mu$ M of SMAP-061, 100nM of Olaparib or combination of SMAP + Olaparib for the course of two weeks (n=3). B) and C) OV81, D) and E) PEO-1 and G) and H) PEO-C4.2 western blot quantification of cell death markers (Cleaved Caspase 3 and Cleaved PARP) and  $\gamma$ H2Ax to evaluate synergy potential of SMAP-061 and Olaparib co-treatment in a dose B), D), F) and time C), E), G) dependent manner. Data is presented as the mean  $\pm$  SEM (n=3), (unpaired Student T-tests, comparing each condition relative to 20 $\mu$ M SMAP B), D), F) or no treatment at zero hours C), E), G), of each respective cell line, \*p < 0.05, \*\*p < 0.01, \*\*\*p < 0.001, \*\*\*\*p < 0.0001).
