# Supplementary material for: Small-Molecule–Mediated Stabilization of PP2A Modulates the Homologous Recombination Pathway and Potentiates DNA Damage-Induced Cell Death
Source: PubMed Central journal article supplement — Mol Cancer Ther. 2023 Feb 14;22(5):599–615. doi: 10.1158/1535-7163.MCT-21-0880 (PMC10157366; doi:10.1158/1535-7163.mct-21-0880), 2023-02-14
Supplement: mct-21-0880_fig.s5_suppsf5.pdf [file mct-21-0880_fig.s5_suppsf5.pdf]

Supplementary Figure 5

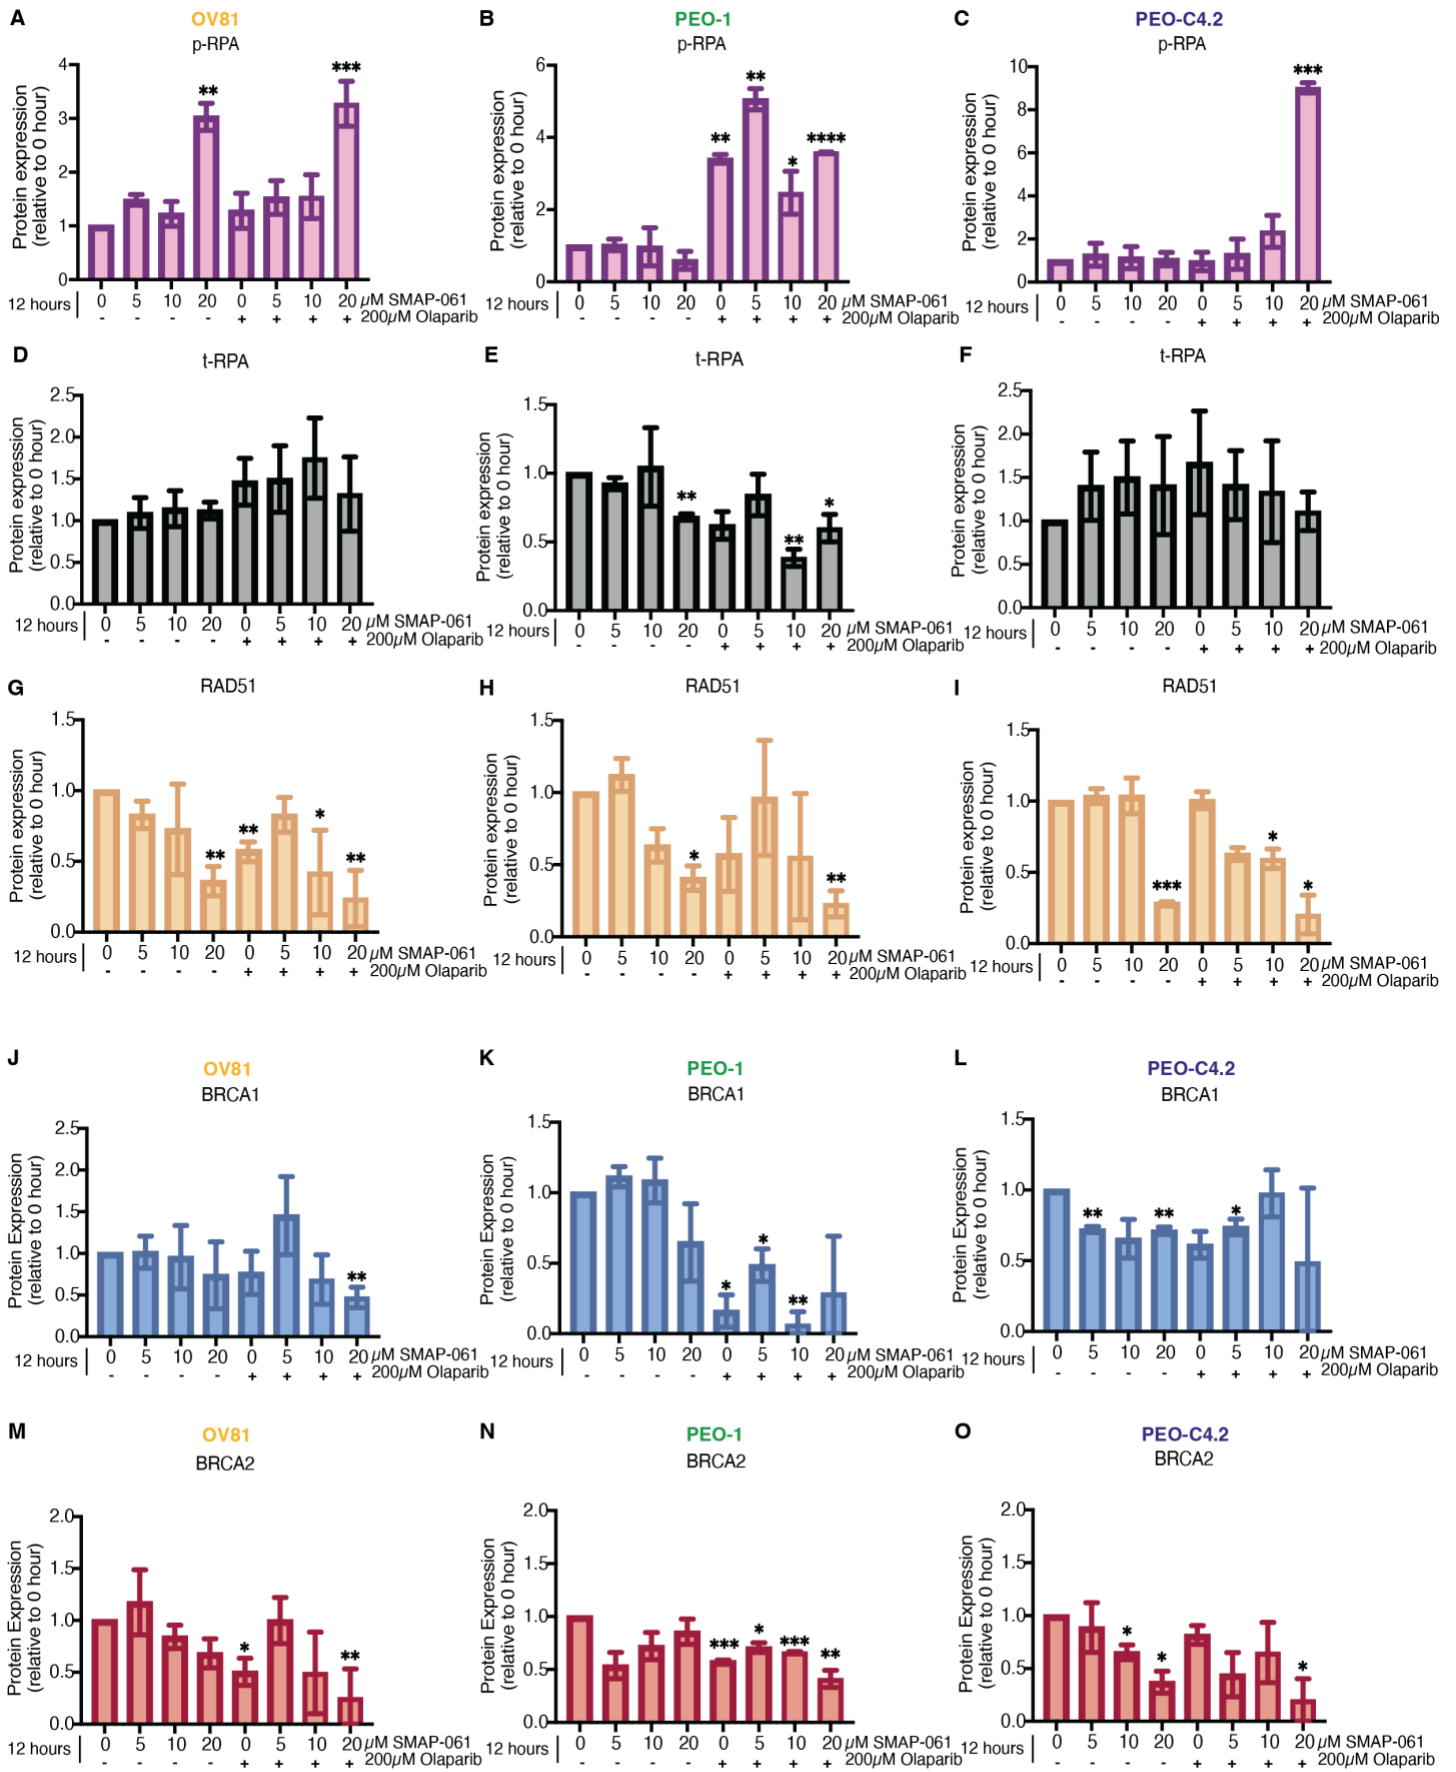

Supplementary Figure 5

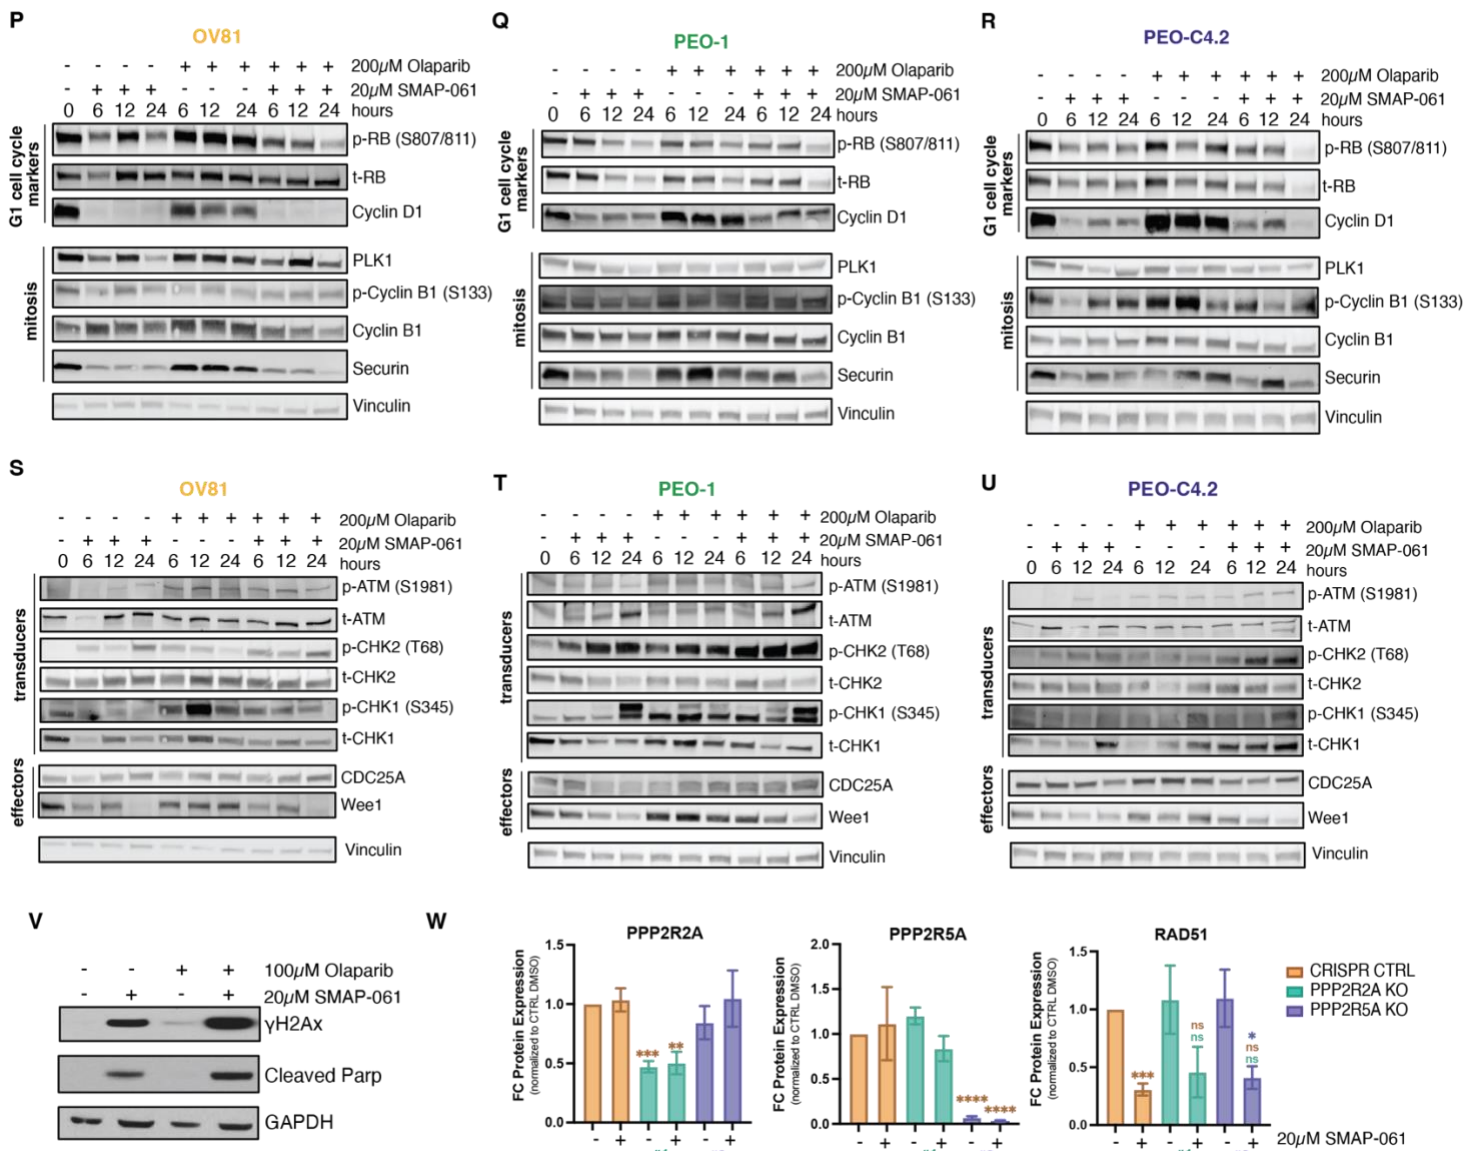

**Supplementary Figure 5 – Co-treatment of SMAP-061 and PARPi synergistically engages the cell cycle and the DDR pathways in a time dependent manner.** A) – O) Quantitation of protein targets expression evaluated on the western blot analysis from Fig. 5A, for OV81, PEO-1 and PEO-C4.2, respectively – A), B), C) p-RPA, D), E), F) t-RPA, G), H), I) RAD51, J), K), L) BRCA1, and M), N), O) BRCA2. Data is presented as the mean ± SEM (n=3), (unpaired Student T-tests, comparing each condition relative to DMSO, \*p < 0.05, \*\*p < 0.01, \*\*\*p < 0.001, \*\*\*\*p < 0.0001). P)-U) Western blot analysis evaluating cell cycle protein expression regulation upon 20µM SMAP-061, 200µM Olaparib or SMAP + Olaparib treatments for P) OV81, Q) PEO-1 and R) PEO-C4.2 during 6, 12 and 24 hours of exposure. **Transducer** and **effector** proteins (Fig. 3A schematic) are also affected by SMAP-061 treatment and significantly more engaged when in combination with PARPi for S) OV81, T) PEO-1 and U) PEO-C4.2 cell lines. V) Western blot analysis evaluating Cleaved PARP and γH2Ax expression levels upon 20µM SMAP-061, 100µM Olaparib or SMAP + Olaparib treatments. GAPDH was used as housekeeping. W) CRISPR Cas9 KO of 2 specific B-subunits (PPP2R2A and PPP2R5A) rescue experiments quantification in Fig. 5I for PPP2R2A, PPP2R5A and RAD51 protein expression. Data presented as the mean ± SD (n=3), (unpaired

Student T-tests, comparing each treatment group to distinct groups, \*p < 0.05, \*\*p < 0.01, \*\*\*p < 0.001, \*\*\*\*p < 0.0001). Data is presented as the mean  $\pm$  SD (n=3).
