# Supplementary material for: Small-Molecule–Mediated Stabilization of PP2A Modulates the Homologous Recombination Pathway and Potentiates DNA Damage-Induced Cell Death
Source: PubMed Central journal article supplement — Mol Cancer Ther. 2023 Feb 14;22(5):599–615. doi: 10.1158/1535-7163.MCT-21-0880 (PMC10157366; doi:10.1158/1535-7163.mct-21-0880), 2023-02-14
Supplement: mct-21-0880_fig.s6_suppsf6.pdf [file mct-21-0880_fig.s6_suppsf6.pdf]

Supplementary Figure 6

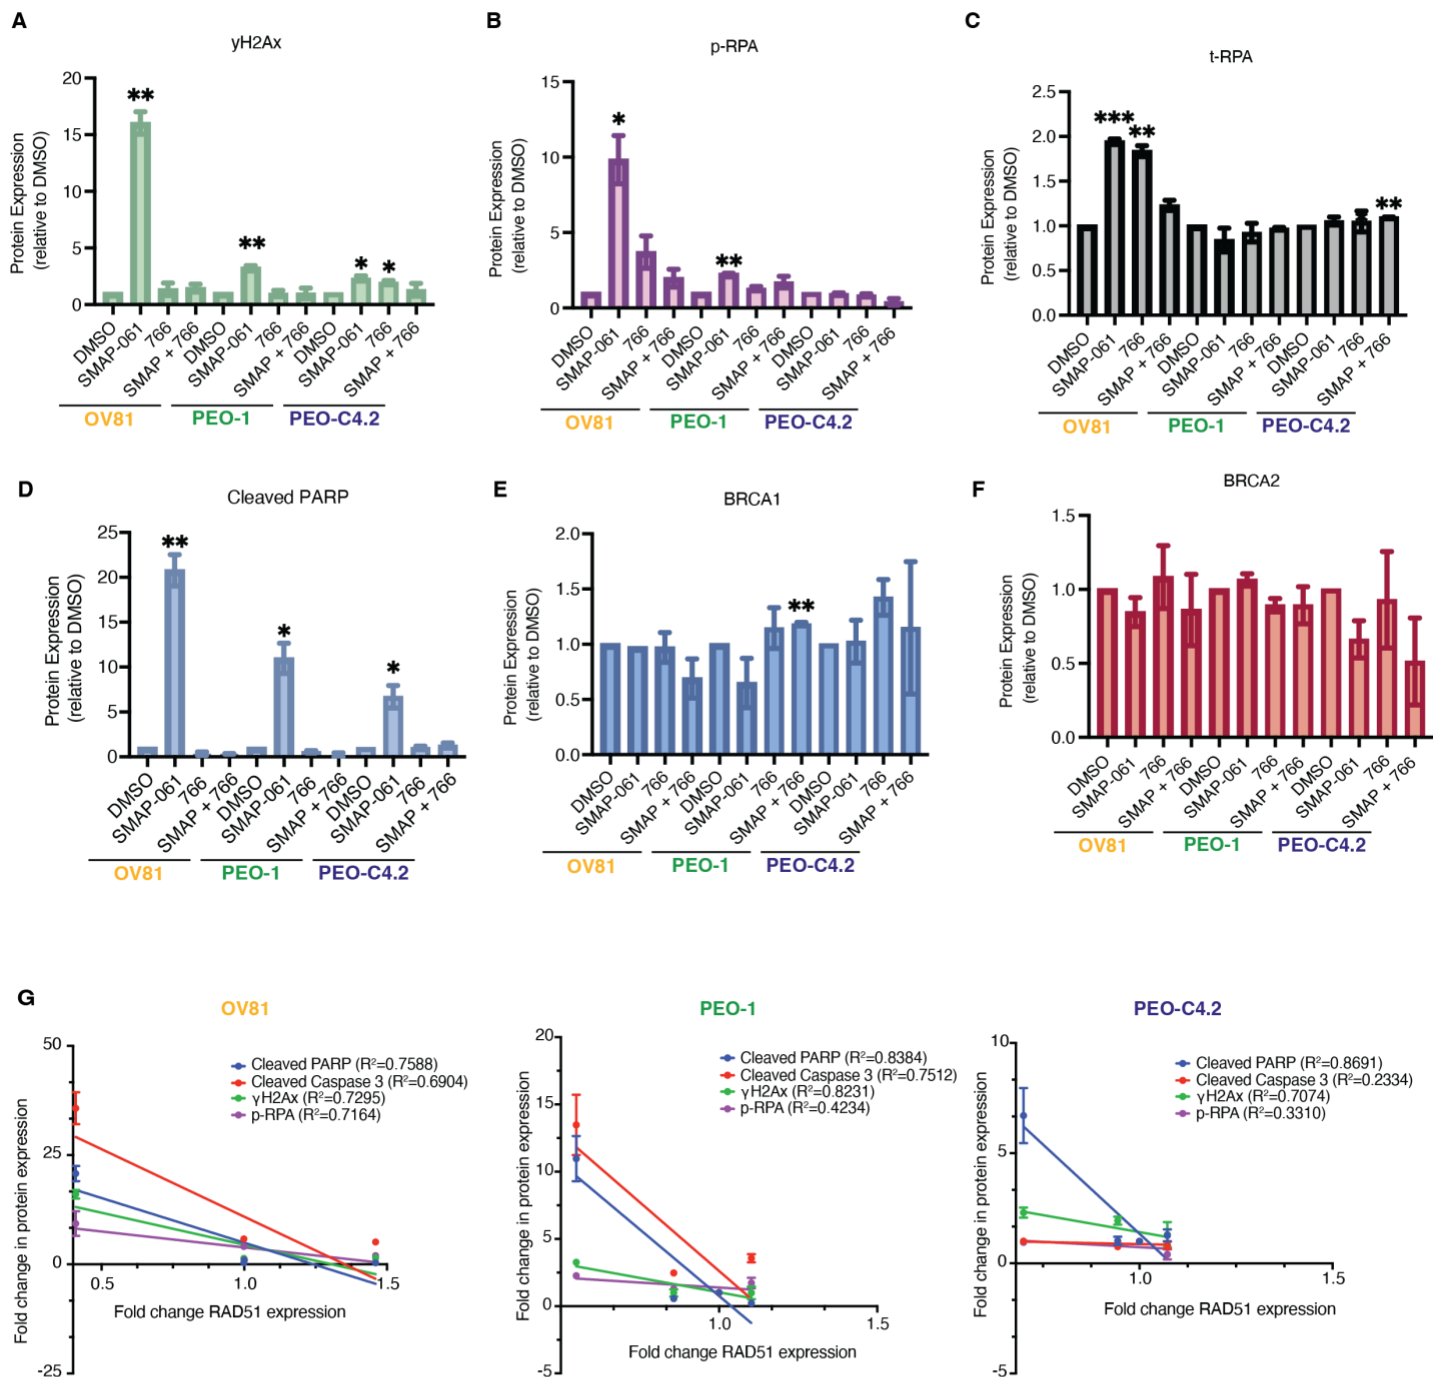

**Supplementary Figure 6 – SMAP-061 specifically targets and downregulates RAD51 through PP2A's activity.** Quantitation of protein targets expression evaluated on the western blot analysis from Fig. 5C, for OV81, PEO-1 and PEO-C4.2, in the presence of DMSO, 20 $\mu$ M SMAP-061, 80 $\mu$ M 766 or SMAP + 766 combination – A)  $\gamma$ H2Ax, B) p-RPA, C) t-RPA, D) Cleaved PARP, E) BRCA1, and F) BRCA2. Data is presented as the mean  $\pm$  SEM (n=3), (unpaired Student T-tests, comparing each condition relative to the DMSO condition of each respective cell line, \*p < 0.05, \*\*p < 0.01). G) Correlation analysis graph and R<sup>2</sup> values comparing RAD51 protein expression with the expression levels of  $\gamma$ H2Ax, p-RPA, cleaved PARP, and cleaved Caspase 3 for OV81, PEO-1 and PEO-C4.2 treated with 20 $\mu$ M SMAP-061. Data presented as the mean  $\pm$  SEM (n=3).
