# Supplementary material for: Small-Molecule–Mediated Stabilization of PP2A Modulates the Homologous Recombination Pathway and Potentiates DNA Damage-Induced Cell Death
Source: PubMed Central journal article supplement — Mol Cancer Ther. 2023 Feb 14;22(5):599–615. doi: 10.1158/1535-7163.MCT-21-0880 (PMC10157366; doi:10.1158/1535-7163.mct-21-0880), 2023-02-14
Supplement: mct-21-0880_fig.s7_suppsf7.pdf [file mct-21-0880_fig.s7_suppsf7.pdf]

Supplementary Figure 7

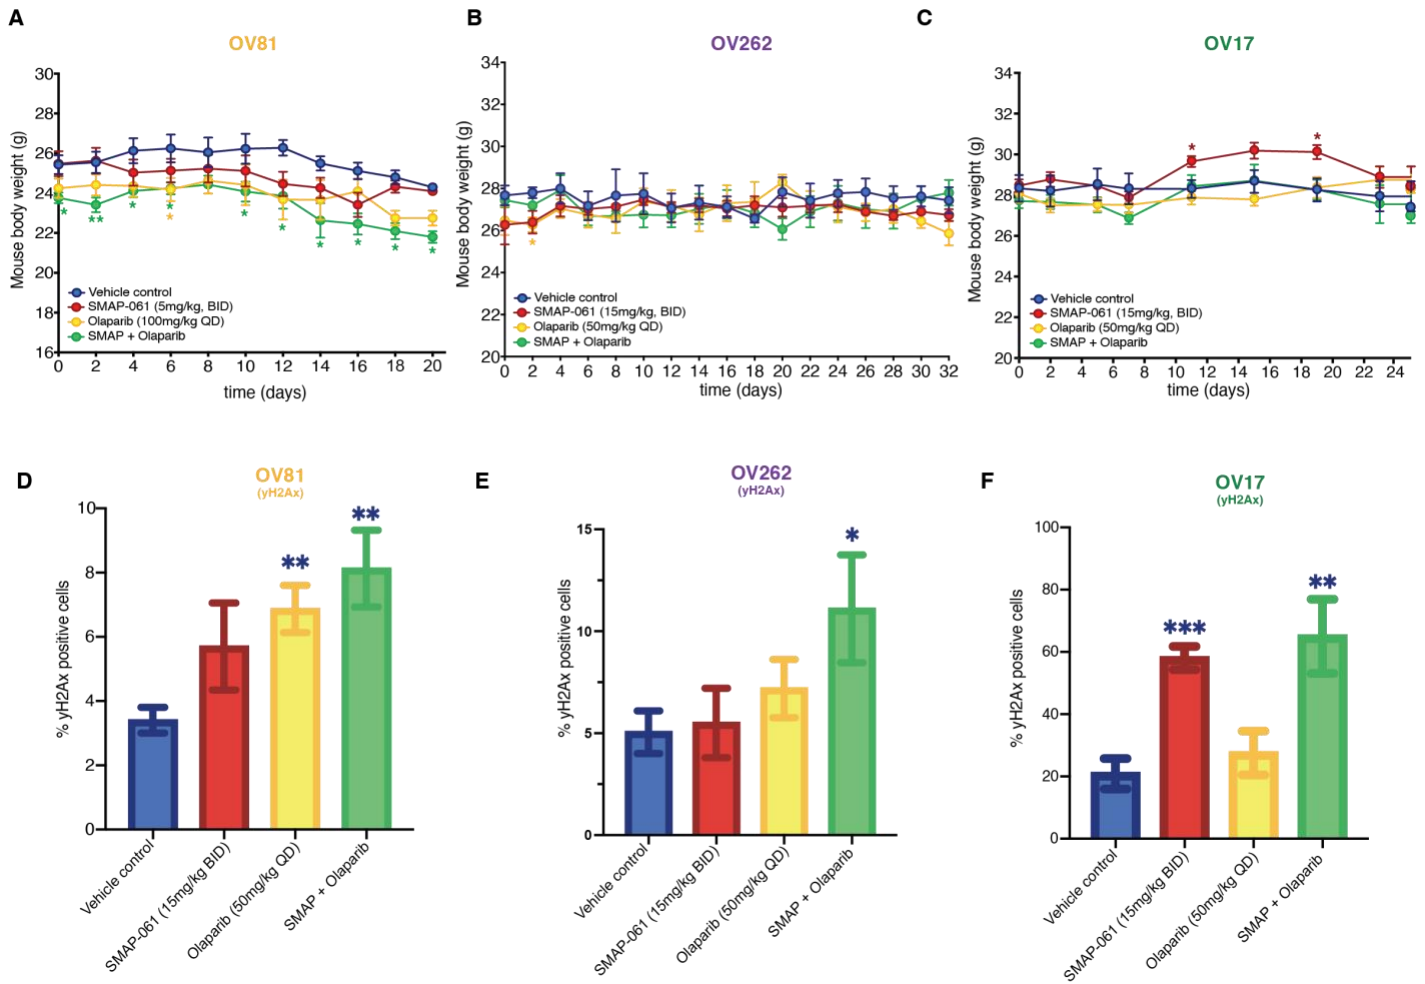

**Supplementary Figure 7 – SMAP-061 show no toxicity effects *in vivo*, having no significant impact on mouse body weight.** A) OV81, B) OV262.2 and C) OV17.1 PDX studies were conducted with tumors implanted in the right flank of NSG mice and allowed to grow between ~80-250mm<sup>3</sup> before enrollment in one of 4 treatment groups: Vehicle control, SMAP-061, Olaparib or SMAP + Olaparib combination. Mouse body weights were measured every other day. Data plotted as a function of time and presented as mean ± SEM (Student T-tests, comparing each treatment group relative to vehicle control, \*p < 0.05, \*\*p < 0.01). D) Quantification of *in vivo* γH2Ax foci formation for C) OV81, E) OV262 and F) OV17 were calculated from Fig. 6C, 6F and 6I, respectively. Data presented as mean ± SEM (Student T-tests, comparing each treatment group relative to vehicle control, \*\*p < 0.01, \*\*\*p < 0.001).
