# Supplementary material for: Small-Molecule–Mediated Stabilization of PP2A Modulates the Homologous Recombination Pathway and Potentiates DNA Damage-Induced Cell Death
Source: PubMed Central journal article supplement — Mol Cancer Ther. 2023 Feb 14;22(5):599–615. doi: 10.1158/1535-7163.MCT-21-0880 (PMC10157366; doi:10.1158/1535-7163.mct-21-0880), 2023-02-14
Supplement: mct-21-0880_table_s1_suppst1.pdf [file mct-21-0880_table_s1_suppst1.pdf]

Supplementary Table 1

A

|           | Gene    | % frequency |          |
|-----------|---------|-------------|----------|
|           |         | Mutation    | Het Loss |
| A subunit | PPP2R1A | 1.01        | 49.3     |
|           | PPP2R1B | 0.25        | 31.9     |
| C subunit | PPP2CA  | 0.25        | 41.9     |
|           | PPP2CB  | 0           | 54.0     |
| B subunit | PPP2R2A | 0.5         | 60.0     |
|           | PPP2R2B | 0.5         | 35.4     |
|           | PPP2R2C | 0.5         | 45.2     |
|           | PPP2R2D | 0.25        | 34.7     |
|           | PPP2R5A | 0.25        | 16.1     |
|           | PPP2R5B | 0.5         | 18.1     |
|           | PPP2R5C | 0.25        | 38.2     |
|           | PPP2R5D | 0.25        | 19.9     |
|           | PPP2R5E | 0.25        | 52.0     |
|           | PPP2R3A | 0.75        | 4.0      |
|           | PPP2R3B | 0           | 56.8     |
|           | PPP2R3C | 0           | 35.9     |
|           | STRN    | 0.25        | 9.6      |
|           | STRN3   | 0.25        | 35.9     |
| STRN4     | 0.25    | 49.5        |          |

B

| Gene A  | Gene B  | Neither | A Not B | B Not A | Both | Log2 Odds Ratio | p-Value | q-Value | Tendency      |
|---------|---------|---------|---------|---------|------|-----------------|---------|---------|---------------|
| PPP2CA  | PPP2R2B | 160     | 24      | 13      | 119  | >3              | <0.001  | <0.001  | Co-occurrence |
| PPP2CB  | PPP2R2A | 101     | 9       | 35      | 171  | >3              | <0.001  | <0.001  | Co-occurrence |
| PPP2R5C | PPP2R5E | 125     | 22      | 62      | 107  | >3              | <0.001  | <0.001  | Co-occurrence |
| PPP2R1B | PPP2R5B | 201     | 55      | 18      | 42   | >3              | <0.001  | <0.001  | Co-occurrence |
| PPP2R1A | PPP2R5C | 109     | 78      | 45      | 84   | 1.383           | <0.001  | <0.001  | Co-occurrence |
| PPP2R2D | PPP2R5C | 135     | 52      | 69      | 60   | 1.175           | <0.001  | 0.009   | Co-occurrence |
| PPP2R2D | PPP2R5E | 107     | 40      | 97      | 72   | 0.99            | 0.003   | 0.045   | Co-occurrence |
| PPP2CA  | PPP2R2A | 72      | 38      | 101     | 105  | 0.978           | 0.004   | 0.047   | Co-occurrence |

Supplementary Table 1 – **PP2A genes alteration and co-occurrence frequencies in HGSC.** A) Mutation or Het Loss percentage frequency for each one of the PP2A scaffolding (A), catalytic (C) and regulatory (B) subunits according to TCGA. Data adapted from cBioPortal. B) Mutual exclusivity analysis comparing Gene A and B expression looking at number of patients that have neither gene, A but not B, B but not A or both genes expressed. Statistical analysis extracted from cBioPortal, utilizing p- value (derived from one-side Fisher Exact Test) and q-value (derived from Benjamini-Hochberg FDR correction) and expected tendency.
