# Supplementary material for: Small-Molecule–Mediated Stabilization of PP2A Modulates the Homologous Recombination Pathway and Potentiates DNA Damage-Induced Cell Death
Source: PubMed Central journal article supplement — Mol Cancer Ther. 2023 Feb 14;22(5):599–615. doi: 10.1158/1535-7163.MCT-21-0880 (PMC10157366; doi:10.1158/1535-7163.mct-21-0880), 2023-02-14
Supplement: mct-21-0880_table_s2_suppst2.pdf [file mct-21-0880_table_s2_suppst2.pdf]

Supplementary Table 2

A

| Cell line ID | Patient Diagnosis                            | Patient age | Site from where cell line was made |
|--------------|----------------------------------------------|-------------|------------------------------------|
| OV78         | Stage IV High Grade Serous Ovarian Carcinoma | 63          | Ascites                            |
| OV81         | Stage IIIC High Grade Serous Ovarian Cancer  | 57          | Ascites                            |
| OV82         | Stage IIIC Low Grade Serous Ovarian Cancer   | 57          | Ascites                            |
| OV84         | Stage IIIC High Grade Serous Ovarian Cancer  | 74          | Ascites                            |
| OV85         | Stage IIIC High Grade Serous Ovarian Cancer  | 77          | Ascites                            |
| OV93         | Stage IIIC Low Grade Serous Ovarian Cancer   | 53          | Ovarian tumor                      |
| OV145        | Stage IIIC ovarian carcinosarcoma            | 82          | Ovarian tumor                      |
| OV262        | Stage IIIC High Grade Serous Ovarian Cancer  | 57          | Omental tumor                      |

B

| Cell line | Characterization  | BRCA1     | BRCA2                               | Cisplatin treatment?                 |
|-----------|-------------------|-----------|-------------------------------------|--------------------------------------|
| PEO-1     | high-grade serous | wild-type | Y1655X                              | no                                   |
| PEO-C4.2  | high-grade serous | wild-type | reverse mutated (wild-type protein) | yes ( <i>in vitro</i> ) (4 passages) |

C

| PDX ID | Characterization                             | BRCA1 status | BRCA2 status |
|--------|----------------------------------------------|--------------|--------------|
| OV81   | Stage IIIC High Grade Serous Ovarian Cancer  | wild-type    | wild-type    |
| OV262  | Stage IIIC High Grade Serous Ovarian Cancer  | wild-type    | N3124I       |
| OV17   | Stage IV High Grade Serous Ovarian Carcinoma | R762fs       | wild-type    |

Supplementary Table 2 – **Patient-Derived cell lines characterization and genetic background.** A) Patient derived cell lines generated in the DiFeo lab and utilized for cell proliferation assays (Fig.2). Samples acquired from either solid tumor or ascites. B) Isogenic cell lines generated and characterized in the Taniguchi Lab. C) Patient-Derived Xenograft (PDX) tumor models and their genetic characterization utilized for *in vivo* target engagement and efficacy studies (Fig.6).
