# Supplementary material for: Small-Molecule–Mediated Stabilization of PP2A Modulates the Homologous Recombination Pathway and Potentiates DNA Damage-Induced Cell Death
Source: PubMed Central journal article supplement — Mol Cancer Ther. 2023 Feb 14;22(5):599–615. doi: 10.1158/1535-7163.MCT-21-0880 (PMC10157366; doi:10.1158/1535-7163.mct-21-0880), 2023-02-14
Supplement: mct-21-0880_table_s3_suppst3.pdf [file mct-21-0880_table_s3_suppst3.pdf]

Supplementary Table 3

A

| Cell line | EC50<br>( $\mu\text{M}$ SMAP) | EC50<br>( $\mu\text{M}$ Cisplatin) |
|-----------|-------------------------------|------------------------------------|
| OV78      | 19.66                         | 50.13                              |
| OV82      | 15.05                         | 15.14                              |
| OV84      | 15.12                         | $\infty$                           |
| OV93      | 19.12                         | 17.18                              |
| OV85      | 23.3                          | $\infty$                           |
| OV145     | 11.57                         | 115                                |

B

| Cell line | EC50<br>( $\mu\text{M}$ SMAP) | EC50<br>( $\mu\text{M}$ Cisplatin) | IC50<br>( $\mu\text{M}$ Olaparib) | EC50<br>( $\mu\text{M}$ SMAP + Olaparib) |
|-----------|-------------------------------|------------------------------------|-----------------------------------|------------------------------------------|
| OV81      | 11.39                         | 5.89                               | 131.3                             | 5.95                                     |
| OV81-CP40 | 11.53                         | 46.57                              | 154.2                             | 8.94                                     |
| PEO-1     | 10.83                         | 4.18                               | 51.85                             | 5.14                                     |
| PEO-C4.2  | 8.41                          | 5.51                               | 108.8                             | 6.71                                     |

C

| Cell line | EC50<br>( $\mu\text{M}$ SMAP + Cisplatin) | Combination Index (CI) |
|-----------|-------------------------------------------|------------------------|
| OV81      | 19.9                                      | 5.1                    |
| PEO-1     | 1.77                                      | 0.6                    |
| PEO-C4.2  | 14.4                                      | 4.3                    |

Supplementary Table 3 – **SMAP-061, Cisplatin and Olaparib** calculated EC<sub>50</sub> and IC<sub>50</sub> values for **HGSC primary cell lines**. A) EC<sub>50</sub> values of patient derived cell lines calculated from the cell viability assays executed in Fig.2A. B) EC<sub>50</sub> and IC<sub>50</sub> values of patient derived cell lines calculated from the cell viability assays conducted in Fig.2B, Fig.4C and 4D. C) EC<sub>50</sub> values of patient derived cell lines calculated from the cell viability isobologram assays performed in Fig.S3.
